# Supplementary material for: Proteogenomics Uncovers a Vast Repertoire of Shared Tumor-Specific Antigens in Ovarian Cancer
Source: Oxford University Press journal article supplement (doi:10.1158/2326-6066.cir-19-0541), 2020-02-11
Supplement: 23266066cir190541-sup-225568_4_supp_6044110_q4kyfd.xlsx [file 23266066cir190541-sup-225568_4_supp_6044110_q4kyfd.xlsx]

## Sheet: GTEx
Tissue	Tissue group	Consortium	Number of randomly selected RNA-Seq samples	Total number of RNA-Seq sample	Percentage of cohort analyzed	Accession numbers (SRA) of randomly selected donors
adipose subcutaneous	other	GTEx	49	442	11.086	SRR599313 SRR608150 SRR608198 SRR612263 SRR612707 SRR612815 SRR612863 SRR612935 SRR613150 SRR613234 SRR613342 SRR613390 SRR613533 SRR613550 SRR613639 SRR613675 SRR613855 SRR613896 SRR613915 SRR613927 SRR614119 SRR614191 SRR614395 SRR614419 SRR614864 SRR615069 SRR615237 SRR615431 SRR615659 SRR615778 SRR615874 SRR615946 SRR617841 SRR654730 SRR654862 SRR654898 SRR655182 SRR655531 SRR655637 SRR655768…
adrenal gland	other	GTEx	50	190	26.3158	SRR1069421 SRR1070913 SRR1072626 SRR1073365 SRR1073775 SRR1074474 SRR1075314 SRR1076632 SRR1076823 SRR1082035 SRR1082616 SRR1082733 SRR1083824 SRR1083892 SRR1085590 SRR1085951 SRR1086046 SRR1087297 SRR1087511 SRR1087606 SRR1088365 SRR1088461 SRR1089479 SRR1089950 SRR1091476 SRR1092160 SRR1092329 SRR1092686 SRR1093625 SRR1093721 SRR1093954 SRR1094144 SRR1099378 SRR1099427 SRR1099598 SRR1099694 SRR…
artery aorta	other	GTEx	50	299	16.7224	SRR1069376 SRR1070111 SRR1070641 SRR1071644 SRR1072078 SRR1072749 SRR1073705 SRR1074478 SRR1074622 SRR1075028 SRR1075579 SRR1076343 SRR1077090 SRR1078586 SRR1079023 SRR1079998 SRR1080148 SRR1081137 SRR1081519 SRR1081910 SRR1082283 SRR1083076 SRR1083286 SRR1083604 SRR1084276 SRR1084460 SRR1085159 SRR654850 SRR808044 SRR808152 SRR808351 SRR808836 SRR808914 SRR809320 SRR809470 SRR809785 SRR809831 SR…
bladder	other	GTEx	12	12	100	SRR1071717 SRR1079830 SRR1081765 SRR1085402 SRR1086236 SRR1092208 SRR1093930 SRR1097296 SRR1099957 SRR1120296 SRR2135324 SRR2135407
brain cortex	MHC low	GTEx	50	158	31.6456	SRR1081741 SRR1082262 SRR1083632 SRR1085975 SRR1310008 SRR1310136 SRR1311400 SRR1311575 SRR1311794 SRR1312428 SRR1314958 SRR1315269 SRR1315866 SRR1316815 SRR1320280 SRR1323043 SRR1323746 SRR1324371 SRR1327593 SRR1328487 SRR598332 SRR601006 SRR601669 SRR602927 SRR603333 SRR604026 SRR608662 SRR612575 SRR614310 SRR615213 SRR615838 SRR627421 SRR627425 SRR627449 SRR627455 SRR654874 SRR656745 SRR659555…
breast	Female organ	GTEx	50	290	17.2414	SRR1068977 SRR1068999 SRR1070208 SRR1070260 SRR1070738 SRR1071084 SRR1071905 SRR1074860 SRR1075484 SRR1076219 SRR1076441 SRR1077139 SRR1077920 SRR1078258 SRR1079948 SRR1081023 SRR1082859 SRR1083052 SRR1083959 SRR1084079 SRR1084674 SRR1086538 SRR1086772 SRR615910 SRR655447 SRR655852 SRR656911 SRR656970 SRR657018 SRR657528 SRR658105 SRR658319 SRR658409 SRR659223 SRR660248 SRR660283 SRR662306 SRR662…
cervix ectocervix	Female organ	GTEx	6	6	100	SRR1075223 SRR1088832 SRR1089562 SRR1096876 SRR1097035 SRR1097574
colon sigmoid	other	GTEx	50	233	21.4592	SRR1069943 SRR1074337 SRR1077380 SRR1081068 SRR1083504 SRR1083678 SRR1084505 SRR1086020 SRR1087271 SRR1090431 SRR1091524 SRR1092493 SRR1093366 SRR1102198 SRR1102224 SRR1102998 SRR1308269 SRR1312577 SRR1312666 SRR1312784 SRR1317110 SRR1317653 SRR1318624 SRR1319038 SRR1320445 SRR1320490 SRR1321377 SRR1322070 SRR1323002 SRR1323215 SRR1324473 SRR1327454 SRR1327505 SRR1327527 SRR1327570 SRR1328528 SRR…
esophagus mucosa	other	GTEx	50	407	12.285	SRR1069231 SRR1069255 SRR1069328 SRR1069666 SRR1069871 SRR1070036 SRR1070060 SRR1070620 SRR1070665 SRR1071207 SRR1071499 SRR1072055 SRR1072297 SRR1072388 SRR1072480 SRR1073631 SRR1074450 SRR1074502 SRR1074578 SRR1075458 SRR1075603 SRR1076195 SRR1076705 SRR1076801 SRR1077310 SRR1077356 SRR1077619 SRR1077850 SRR1078140 SRR1078538 SRR807679 SRR807703 SRR809406 SRR809919 SRR812294 SRR812318 SRR813283…
fallopian tube	Female organ	GTEx	7	7	100	SRR1071359 SRR1074140 SRR1076584 SRR1082520 SRR1083776 SRR1101693 SRR811938
heart left ventricle	other	GTEx	50	303	16.5017	SRR598148 SRR598509 SRR598589 SRR599025 SRR599086 SRR599249 SRR599380 SRR600474 SRR600829 SRR600852 SRR600924 SRR601239 SRR601613 SRR601645 SRR601868 SRR601986 SRR602106 SRR602437 SRR602461 SRR603449 SRR603918 SRR603968 SRR604122 SRR604174 SRR604206 SRR604230 SRR606939 SRR607252 SRR607313 SRR607970 SRR608096 SRR608480 SRR612335 SRR612719 SRR612875 SRR613186 SRR613462 SRR613510 SRR613759 SRR614215…
kidney	other	GTEx	38	38	100	SRR1071807 SRR1080366 SRR1085759 SRR1089504 SRR1105272 SRR1314940 SRR1317086 SRR1325483 SRR1328447 SRR1329154 SRR1340662 SRR1362263 SRR1377578 SRR1380931 SRR1396700 SRR1416516 SRR1420649 SRR1432650 SRR1433066 SRR1435730 SRR1437274 SRR1442708 SRR1443092 SRR1445835 SRR1447631 SRR1452888 SRR1456711 SRR1465871 SRR1468426 SRR1469746 SRR1486080 SRR1490658 SRR1500261 SRR2135353 SRR2135396 SRR809943 SRR8…
liver	other	GTEx	50	175	28.5714	SRR1069141 SRR1070689 SRR1071668 SRR1073435 SRR1075102 SRR1075804 SRR1076022 SRR1080117 SRR1080294 SRR1081184 SRR1082151 SRR1083983 SRR1086256 SRR1087007 SRR1087321 SRR1089446 SRR1090095 SRR1090556 SRR1091865 SRR1093861 SRR1095383 SRR1095913 SRR1098737 SRR1100991 SRR1101883 SRR1102152 SRR1102899 SRR1105248 SRR1120939 SRR1310433 SRR1312266 SRR1313807 SRR1316096 SRR1317532 SRR1317554 SRR1321877 SRR…
lung	other	GTEx	50	427	11.7096	SRR1070015 SRR1070358 SRR1071568 SRR1072150 SRR1073119 SRR1074769 SRR1081283 SRR1084602 SRR1084766 SRR1086728 SRR1087559 SRR1091670 SRR1095695 SRR1098074 SRR1098785 SRR1098998 SRR1099286 SRR1099546 SRR1102079 SRR1102804 SRR1307123 SRR1307615 SRR1308239 SRR1308504 SRR1308939 SRR1309452 SRR1309468 SRR1309490 SRR1310313 SRR1310520 SRR1310797 SRR1310959 SRR1310975 SRR1312209 SRR1312522 SRR1312558 SRR…
minor salivary gland	other	GTEx	50	97	51.5464	SRR1071105 SRR1078392 SRR1080790 SRR1081589 SRR1097245 SRR1100608 SRR1315412 SRR1318089 SRR1321897 SRR1325201 SRR1328715 SRR1330723 SRR1331771 SRR1338384 SRR1339987 SRR1340260 SRR1348929 SRR1353600 SRR1356057 SRR1358391 SRR1376380 SRR1376450 SRR1376741 SRR1381185 SRR1382978 SRR1385690 SRR1386927 SRR1388459 SRR1389955 SRR1397720 SRR1400931 SRR1404339 SRR1405147 SRR1406135 SRR1406348 SRR1407044 SRR…
muscle	other	GTEx	50	564	8.86525	SRR1068855 SRR1071231 SRR1071594 SRR1071955 SRR1074359 SRR1074670 SRR1074719 SRR1077288 SRR1077805 SRR1080766 SRR1084369 SRR1084417 SRR1085519 SRR1087245 SRR1087825 SRR1088581 SRR1089424 SRR1089901 SRR1090265 SRR1092349 SRR1092985 SRR1094051 SRR1095720 SRR1096174 SRR1096662 SRR1098474 SRR1098879 SRR1100588 SRR1102830 SRR1105057 SRR812773 SRR813656 SRR813802 SRR813983 SRR815020 SRR815044 SRR815470…
nerve	MHC low	GTEx	50	414	12.0773	SRR1070086 SRR1070159 SRR1070597 SRR1072724 SRR1073553 SRR1074550 SRR1075384 SRR1075825 SRR1076559 SRR1079636 SRR1079850 SRR1080093 SRR1082059 SRR1082809 SRR1086417 SRR1087079 SRR1088706 SRR1090070 SRR1091184 SRR1092062 SRR1095334 SRR1096007 SRR1096222 SRR1096478 SRR1096500 SRR1096806 SRR1097055 SRR1098385 SRR1310455 SRR1310645 SRR1311131 SRR1311308 SRR1312370 SRR1312464 SRR813704 SRR814052 SRR81…
ovary	Female organ	GTEx	50	133	37.594	SRR1071475 SRR1073389 SRR1073878 SRR1075360 SRR1078042 SRR1078636 SRR1078735 SRR1081987 SRR1082352 SRR1082471 SRR1085565 SRR1085736 SRR1086212 SRR1086656 SRR1088856 SRR1089134 SRR1090698 SRR1090928 SRR1091164 SRR1092038 SRR1093601 SRR1093747 SRR1096458 SRR1097124 SRR1097148 SRR1098807 SRR1099310 SRR1099669 SRR1101453 SRR1101859 SRR1102005 SRR1102780 SRR1120276 SRR1312446 SRR1315495 SRR1316513 SRR…
pancreas	other	GTEx	50	248	20.1613	SRR1069352 SRR1070403 SRR1070764 SRR1071519 SRR1072007 SRR1072104 SRR1072972 SRR1073021 SRR1073167 SRR1073991 SRR1074090 SRR1074385 SRR1075174 SRR1075336 SRR1076244 SRR1076868 SRR1078066 SRR1079754 SRR1080624 SRR1082080 SRR1082544 SRR1084128 SRR1084323 SRR1085187 SRR1085310 SRR1086070 SRR1087728 SRR1088291 SRR1088413 SRR1088537 SRR1089537 SRR1089688 SRR1091032 SRR1091144 SRR1092937 SRR1093340 SRR…
pituitary	other	GTEx	50	183	27.3224	SRR1076393 SRR1077455 SRR1077708 SRR1077968 SRR1082664 SRR1082685 SRR1089785 SRR1096101 SRR1096339 SRR1101612 SRR1309119 SRR1309638 SRR1310817 SRR1311599 SRR1311709 SRR1311958 SRR1317963 SRR1318026 SRR1319946 SRR1321650 SRR1323977 SRR1324141 SRR1324184 SRR1325161 SRR1325944 SRR1326408 SRR1326797 SRR1328143 SRR1331962 SRR1332024 SRR1332904 SRR1336029 SRR1336529 SRR1337321 SRR1339007 SRR1340241 SRR…
skin	other	GTEx	50	387	12.9199	SRR1069048 SRR1070232 SRR1070888 SRR1073605 SRR1074289 SRR1075247 SRR1076292 SRR1077263 SRR1077898 SRR1079434 SRR1083215 SRR1083579 SRR1084299 SRR1087801 SRR1091597 SRR1094216 SRR1095503 SRR1096408 SRR1098216 SRR1100703 SRR1309920 SRR1309985 SRR1310053 SRR1311153 SRR1311224 SRR1311916 SRR1312124 SRR1312244 SRR1312645 SRR1312934 SRR1313494 SRR1314036 SRR1314137 SRR1314728 SRR1314810 SRR1315912 SRR…
small intestine	other	GTEx	50	137	36.4964	SRR1070133 SRR1071181 SRR1072602 SRR1074934 SRR1076046 SRR1076465 SRR1077728 SRR1079973 SRR1084154 SRR1085378 SRR1087680 SRR1310497 SRR1311731 SRR1313664 SRR1319059 SRR1319301 SRR1321483 SRR1326449 SRR1326845 SRR1329508 SRR1330371 SRR1337749 SRR1337930 SRR1338402 SRR1339086 SRR1340762 SRR1340782 SRR1343136 SRR1344079 SRR1344364 SRR1351907 SRR1354400 SRR1356327 SRR1358803 SRR1359027 SRR1359587 SRR…
stomach	other	GTEx	50	262	19.084	SRR1068953 SRR1069166 SRR1069714 SRR1069778 SRR1070382 SRR1070549 SRR1070884 SRR1071761 SRR1072199 SRR1072700 SRR1072821 SRR1072920 SRR1073459 SRR1074066 SRR1075874 SRR1076268 SRR1076417 SRR1076990 SRR1078090 SRR1078759 SRR1079900 SRR1080672 SRR1081092 SRR1081235 SRR1081717 SRR1081935 SRR1082933 SRR1082957 SRR1083149 SRR1083191 SRR1083262 SRR1083360 SRR1083408 SRR1084252 SRR1085450 SRR1087101 SRR…
testis	MHC low	GTEx	50	259	19.305	SRR1068788 SRR1068905 SRR1069734 SRR1070479 SRR1071379 SRR1071429 SRR1072845 SRR1073531 SRR1075607 SRR1076490 SRR1077753 SRR1078299 SRR1078612 SRR1079455 SRR1079612 SRR1080022 SRR1080811 SRR1080859 SRR1081357 SRR1081401 SRR1081449 SRR1081614 SRR1081663 SRR1081688 SRR1082307 SRR1083554 SRR1084347 SRR1087055 SRR1087535 SRR1088241 SRR1308288 SRR1309425 SRR1311329 SRR1312288 SRR1314014 SRR807517 SRR8…
thyroid	other	GTEx	50	446	11.2108	SRR597952 SRR598068 SRR598100 SRR598364 SRR598565 SRR598645 SRR599122 SRR599346 SRR599412 SRR601157 SRR601359 SRR601525 SRR601549 SRR601843 SRR601962 SRR602338 SRR602389 SRR602951 SRR602978 SRR603036 SRR603268 SRR603726 SRR603834 SRR603942 SRR604148 SRR604294 SRR604342 SRR607502 SRR607679 SRR607705 SRR608064 SRR608120 SRR608512 SRR613018 SRR613258 SRR613402 SRR613711 SRR613795 SRR613975 SRR614023…
uterus	Female organ	GTEx	50	111	45.045	SRR1069466 SRR1071737 SRR1073483 SRR1074430 SRR1075850 SRR1077159 SRR1077211 SRR1077996 SRR1078114 SRR1078188 SRR1078212 SRR1079213 SRR1079408 SRR1079874 SRR1080342 SRR1082128 SRR1084553 SRR1085358 SRR1086369 SRR1309745 SRR1313991 SRR1319242 SRR1319991 SRR1321720 SRR1323234 SRR1329423 SRR1330082 SRR1336682 SRR1338468 SRR1339258 SRR1343943 SRR1353686 SRR1358126 SRR1360280 SRR1361138 SRR1361838 SRR…
vagina	Female organ	GTEx	50	115	43.4783	SRR1070286 SRR1070789 SRR1071832 SRR1072129 SRR1073045 SRR1073095 SRR1075150 SRR1076892 SRR1079143 SRR1079356 SRR1079686 SRR1079706 SRR1080534 SRR1080580 SRR1082423 SRR1083171 SRR1083337 SRR1084228 SRR1087463 SRR1089106 SRR1089761 SRR1093124 SRR1093410 SRR1093814 SRR1095599 SRR1097728 SRR1101061 SRR1101907 SRR1313747 SRR1318390 SRR1320650 SRR1322115 SRR1323957 SRR1328464 SRR1330018 SRR1330450 SRR…
