# Supplementary material for: Proteogenomics Uncovers a Vast Repertoire of Shared Tumor-Specific Antigens in Ovarian Cancer
Source: Oxford University Press journal article supplement (doi:10.1158/2326-6066.cir-19-0541), 2020-02-11
Supplement: 23266066cir190541-sup-225568_4_supp_6078585_q5cgpp.xlsx [file 23266066cir190541-sup-225568_4_supp_6078585_q5cgpp.xlsx]

## Sheet: TCGA-OV mRNA-Seq dataset
bcr_patient_barcode
TCGA-24-1430-01A-01R-1566-13
TCGA-24-2290-01A-01R-1568-13
TCGA-13-1410-01A-01R-1565-13
TCGA-13-0901-01B-01R-1565-13
TCGA-25-1323-01A-01R-1565-13
TCGA-24-2297-01A-01R-1568-13
TCGA-13-0720-01A-01R-1564-13
TCGA-24-1428-01A-01R-1564-13
TCGA-31-1951-01A-01R-1568-13
TCGA-24-1425-01A-02R-1566-13
TCGA-13-0884-01B-01R-1565-13
TCGA-25-2042-01A-01R-1568-13
TCGA-61-1738-01A-01R-1567-13
TCGA-23-1029-01B-01R-1567-13
TCGA-13-0924-01A-01R-1564-13
TCGA-23-2084-01A-02R-1568-13
TCGA-13-1492-01A-01R-1565-13
TCGA-24-2035-01A-01R-1568-13
TCGA-24-2293-01A-01R-1568-13
TCGA-24-1551-01A-01R-1566-13
TCGA-04-1536-01A-01R-1566-13
TCGA-04-1514-01A-01R-1566-13
TCGA-24-2271-01A-01R-1568-13
TCGA-61-1911-01A-01R-1567-13
TCGA-24-2289-01A-01R-1568-13
TCGA-13-0908-01B-01R-1565-13
TCGA-24-1552-01A-01R-1566-13
TCGA-24-1417-01A-01R-1565-13
TCGA-13-1411-01A-01R-1565-13
TCGA-20-0987-01A-02R-1564-13
TCGA-23-1024-01A-02R-1564-13
TCGA-13-1507-01A-01R-1565-13
TCGA-61-1724-01A-01R-1568-13
TCGA-29-1769-01A-01R-1567-13
TCGA-09-1673-01A-01R-1566-13
TCGA-24-2267-01A-01R-1568-13
TCGA-24-2298-01A-01R-1569-13
TCGA-24-2033-01A-01R-1568-13
TCGA-24-1470-01A-01R-1566-13
TCGA-61-2110-01A-01R-1568-13
TCGA-61-2097-01A-02R-1568-13
TCGA-24-1846-01A-01R-1567-13
TCGA-24-1427-01A-01R-1565-13
TCGA-25-1313-01A-01R-1565-13
TCGA-24-1843-01A-01R-1567-13
TCGA-61-1733-01A-01R-1567-13
TCGA-25-1322-01A-01R-1565-13
TCGA-04-1655-01A-01R-1566-13
TCGA-25-1318-01A-01R-1565-13
TCGA-29-1695-01A-01R-1567-13
TCGA-09-2044-01B-01R-1568-13
TCGA-29-1784-01A-02R-1567-13
TCGA-23-1123-01A-01R-1565-13
TCGA-24-2281-01A-01R-1568-13
TCGA-25-2409-01A-01R-1569-13
TCGA-20-1683-01A-01R-1566-13
TCGA-13-0725-01A-01R-1564-13
TCGA-29-1770-01A-01R-1567-13
TCGA-25-1326-01A-01R-1565-13
TCGA-29-2427-01A-01R-1569-13
TCGA-13-1498-01A-01R-1565-13
TCGA-24-2261-01A-01R-1568-13
TCGA-24-1435-01A-01R-1566-13
TCGA-04-1347-01A-01R-1564-13
TCGA-24-1562-01A-01R-1566-13
TCGA-25-2393-01A-01R-1569-13
TCGA-24-2024-01A-02R-1568-13
TCGA-61-1725-01A-01R-1567-13
TCGA-24-1434-01A-01R-1566-13
TCGA-24-1469-01A-01R-1566-13
TCGA-36-1569-01A-01R-1566-13
TCGA-04-1357-01A-01R-1565-13
TCGA-29-1697-01A-01R-1567-13
TCGA-04-1361-01A-01R-1565-13
TCGA-24-1928-01A-01R-1567-13
TCGA-25-1317-01A-01R-1565-13
TCGA-24-1413-01A-01R-1565-13
TCGA-25-1626-01A-01R-1566-13
TCGA-24-2262-01A-01R-1568-13
TCGA-24-1845-01A-01R-1567-13
TCGA-13-0891-01A-01R-1564-13
TCGA-61-2111-01A-01R-1568-13
TCGA-30-1892-01A-01R-1568-13
TCGA-29-2425-01A-01R-1569-13
TCGA-24-1105-01A-01R-1565-13
TCGA-25-1631-01A-01R-1569-13
TCGA-09-1669-01A-01R-1566-13
TCGA-25-1312-01A-01R-1565-13
TCGA-24-0979-01A-01R-1565-13
TCGA-59-2352-01A-01R-1569-13
TCGA-13-0906-01A-01R-1564-13
TCGA-61-2012-01A-01R-1568-13
TCGA-24-1422-01A-01R-1565-13
TCGA-13-0920-01A-01R-1564-13
TCGA-29-A5NZ-01A-11R-A406-31
TCGA-13-0724-01A-01R-1564-13
TCGA-13-0768-01A-01R-1569-13
TCGA-24-1923-01A-01R-1567-13
TCGA-09-2051-01A-01R-1568-13
TCGA-25-1632-01A-01R-1566-13
TCGA-24-0968-01A-01R-1569-13
TCGA-25-1877-01A-01R-1567-13
TCGA-04-1350-01A-01R-1565-13
TCGA-57-1584-01A-01R-1566-13
TCGA-24-2020-01A-01R-1567-13
TCGA-61-1736-01B-01R-1568-13
TCGA-25-2400-01A-01R-1569-13
TCGA-13-1501-01A-01R-1565-13
TCGA-25-1630-01A-01R-1566-13
TCGA-04-1365-01A-01R-1565-13
TCGA-10-0928-01A-02R-1564-13
TCGA-24-1464-01A-01R-1566-13
TCGA-29-2428-01A-01R-1569-13
TCGA-20-1687-01A-01R-1566-13
TCGA-13-0913-02A-01R-1564-13
TCGA-23-1116-01A-01R-1564-13
TCGA-5X-AA5U-01A-11R-A406-31
TCGA-13-1497-01A-01R-1565-13
TCGA-24-2038-01A-01R-1568-13
TCGA-13-0727-01A-01R-1564-13
TCGA-13-1407-01A-01R-1565-13
TCGA-09-2053-01C-01R-1568-13
TCGA-23-1119-01A-02R-1565-13
TCGA-04-1331-01A-01R-1569-13
TCGA-29-1711-01A-01R-1567-13
TCGA-24-1424-01A-01R-1565-13
TCGA-23-1027-01A-02R-1564-13
TCGA-36-1576-01A-01R-1566-13
TCGA-13-1509-01A-01R-1565-13
TCGA-29-1781-01A-01R-1567-13
TCGA-29-1768-01A-01R-1567-13
TCGA-61-1721-01A-01R-1569-13
TCGA-29-1705-01A-01R-1567-13
TCGA-13-1487-01A-01R-1565-13
TCGA-13-1404-01A-01R-1565-13
TCGA-59-2351-01A-01R-1569-13
TCGA-09-1666-01A-01R-1566-13
TCGA-24-1850-01A-01R-1567-13
TCGA-13-1495-01A-01R-1565-13
TCGA-04-1530-01A-02R-1569-13
TCGA-61-2009-01A-01R-1568-13
TCGA-61-2104-01A-01R-1568-13
TCGA-24-1549-01A-01R-1566-13
TCGA-29-1693-01A-01R-1567-13
TCGA-57-1582-01A-01R-1566-13
TCGA-10-0927-01A-02R-1564-13
TCGA-13-1477-01A-01R-1565-13
TCGA-36-1570-01A-01R-1566-13
TCGA-24-1426-01A-01R-1565-13
TCGA-04-1542-01A-01R-1566-13
TCGA-24-1474-01A-01R-1566-13
TCGA-13-1483-01A-01R-1565-13
TCGA-09-0369-01A-01R-1564-13
TCGA-30-1866-01A-02R-1568-13
TCGA-09-0366-01A-01R-1564-13
TCGA-24-1550-01A-01R-1566-13
TCGA-61-1907-01A-01R-1567-13
TCGA-29-1785-01A-01R-1567-13
TCGA-20-0991-01A-01R-1564-13
TCGA-29-1774-01A-01R-1567-13
TCGA-24-1544-01A-01R-1566-13
TCGA-24-1844-01A-01R-1567-13
TCGA-13-1489-02A-01R-1565-13
TCGA-29-1710-01A-02R-1567-13
TCGA-24-0970-01B-01R-1565-13
TCGA-13-0911-01A-01R-1564-13
TCGA-23-1809-01A-01R-1566-13
TCGA-25-1633-01A-01R-1566-13
TCGA-24-0966-01A-01R-1564-13
TCGA-23-1021-01B-01R-1564-13
TCGA-59-A5PD-01A-11R-A406-31
TCGA-24-2036-01A-01R-1568-13
TCGA-29-1783-01A-01R-1567-13
TCGA-25-2399-01A-01R-1569-13
TCGA-24-1416-01A-01R-1565-13
TCGA-24-1546-01A-01R-1566-13
TCGA-25-2398-01A-01R-1569-13
TCGA-25-1320-01A-01R-1565-13
TCGA-61-2109-01A-01R-1568-13
TCGA-24-1423-01A-01R-1565-13
TCGA-29-1761-01A-01R-1567-13
TCGA-23-1110-01A-01R-1564-13
TCGA-04-1648-01A-01R-1567-13
TCGA-57-1994-01A-01R-1568-13
TCGA-24-2254-01A-01R-1568-13
TCGA-25-1634-01A-01R-1566-13
TCGA-23-1113-01A-01R-1564-13
TCGA-20-1682-01A-01R-1564-13
TCGA-57-1993-01A-01R-1568-13
TCGA-25-2391-01A-01R-1569-13
TCGA-13-0762-01A-01R-1564-13
TCGA-25-1329-01A-01R-1565-13
TCGA-29-1777-01A-01R-1567-13
TCGA-10-0933-01A-01R-1569-13
TCGA-09-0364-01A-02R-1564-13
TCGA-10-0937-01A-02R-1564-13
TCGA-24-2027-01A-01R-1567-13
TCGA-24-1565-01A-01R-1566-13
TCGA-13-0893-01B-01R-1565-13
TCGA-31-1953-01A-01R-1568-13
TCGA-57-1585-01A-01R-1566-13
TCGA-23-1023-01A-02R-1564-13
TCGA-24-1924-01A-01R-1567-13
TCGA-24-1418-01A-01R-1565-13
TCGA-24-1558-01A-01R-1566-13
TCGA-13-0897-01A-01R-1564-13
TCGA-25-1316-01A-01R-1565-13
TCGA-25-2404-01A-01R-1569-13
TCGA-29-1688-01A-01R-1566-13
TCGA-VG-A8LO-01A-11R-A406-31
TCGA-24-1104-01A-01R-1565-13
TCGA-09-1665-01B-01R-1566-13
TCGA-30-1861-01A-01R-1568-13
TCGA-30-1714-01A-02R-1567-13
TCGA-25-1627-01A-01R-1566-13
TCGA-61-1998-01A-01R-1568-13
TCGA-09-1659-01B-01R-1564-13
TCGA-13-1409-01A-01R-1565-13
TCGA-25-1328-01A-01R-1565-13
TCGA-09-1667-01C-01R-1566-13
TCGA-23-1030-01A-02R-1564-13
TCGA-30-1862-01A-02R-1568-13
TCGA-30-1718-01A-01R-1567-13
TCGA-13-1403-01A-01R-1565-13
TCGA-04-1332-01A-01R-1564-13
TCGA-WR-A838-01A-12R-A406-31
TCGA-23-1028-01A-01R-1564-13
TCGA-59-2350-01A-01R-1569-13
TCGA-25-2392-01A-01R-1569-13
TCGA-OY-A56Q-01A-11R-A406-31
TCGA-23-1026-01B-01R-1569-13
TCGA-61-1741-01A-02R-1567-13
TCGA-23-1122-01A-01R-1565-13
TCGA-23-2078-01A-01R-1568-13
TCGA-13-1488-01A-01R-1565-13
TCGA-24-2288-01A-01R-1568-13
TCGA-61-2113-01A-01R-1568-13
TCGA-09-0367-01A-01R-1564-13
TCGA-30-1860-01A-01R-1568-13
TCGA-61-1995-01A-01R-1568-13
TCGA-29-1701-01A-01R-1567-13
TCGA-23-1109-01A-01R-1564-13
TCGA-10-0938-01A-02R-1564-13
TCGA-61-1918-01A-01R-1568-13
TCGA-13-1505-01A-01R-1565-13
TCGA-30-1857-01A-02R-1569-13
TCGA-59-2354-01A-01R-1569-13
TCGA-04-1651-01A-01R-1567-13
TCGA-36-1574-01A-01R-1566-13
TCGA-29-1696-01A-01R-1567-13
TCGA-29-2414-01A-02R-1569-13
TCGA-61-1728-01A-01R-1568-13
TCGA-25-1321-01A-01R-1565-13
TCGA-24-0982-01A-01R-1565-13
TCGA-61-1737-01A-01R-1567-13
TCGA-24-1103-01A-01R-1565-13
TCGA-13-A5FT-01A-11R-A406-31
TCGA-29-1691-01A-01R-1566-13
TCGA-24-1557-01A-01R-1566-13
TCGA-57-1583-01A-01R-1566-13
TCGA-13-0887-01A-01R-1564-13
TCGA-29-1778-01A-01R-1567-13
TCGA-24-1567-01A-01R-1566-13
TCGA-36-1568-01A-01R-1566-13
TCGA-25-1870-01A-01R-1567-13
TCGA-13-1485-01A-02R-1565-13
TCGA-13-0804-01A-01R-1564-13
TCGA-24-1563-01A-01R-1566-13
TCGA-23-1022-01A-01R-1564-13
TCGA-25-1628-01A-01R-1566-13
TCGA-36-1571-01A-01R-1566-13
TCGA-61-2102-01A-01R-1568-13
TCGA-24-2023-01A-01R-1567-13
TCGA-25-1319-01A-01R-1565-13
TCGA-13-1405-01A-01R-1565-13
TCGA-23-1120-01A-02R-1565-13
TCGA-13-0886-01A-01R-1569-13
TCGA-24-1847-01A-01R-1566-13
TCGA-25-1315-01A-01R-1565-13
TCGA-24-1560-01A-01R-1566-13
TCGA-23-1114-01B-01R-1566-13
TCGA-04-1356-01A-01R-1569-13
TCGA-13-1510-01A-02R-1565-13
TCGA-24-1603-01A-01R-1566-13
TCGA-04-1519-01A-01R-1565-13
TCGA-25-1623-01A-01R-1566-13
TCGA-29-1707-02A-01R-1567-13
TCGA-09-1662-01A-01R-1566-13
TCGA-09-2054-01A-01R-1568-13
TCGA-13-1512-01A-01R-1565-13
TCGA-30-1891-01A-01R-1568-13
TCGA-29-1703-01A-01R-1567-13
TCGA-13-0730-01A-01R-1564-13
TCGA-13-0766-01A-02R-1564-13
TCGA-31-1959-01A-01R-1568-13
TCGA-57-1586-01A-02R-1567-13
TCGA-10-0931-01A-01R-1564-13
TCGA-04-1364-01A-01R-1565-13
TCGA-30-1853-01A-02R-1567-13
TCGA-13-0883-01A-02R-1569-13
TCGA-13-1511-01A-01R-1565-13
TCGA-24-1930-01A-01R-1567-13
TCGA-24-1842-01A-01R-1567-13
TCGA-29-1763-01A-02R-1567-13
TCGA-10-0936-01A-01R-1564-13
TCGA-29-1690-01A-01R-1566-13
TCGA-31-1944-01A-01R-1568-13
TCGA-31-1946-01A-01R-1568-13
TCGA-04-1338-01A-01R-1564-13
TCGA-13-0797-01A-01R-1564-13
TCGA-31-1956-01A-01R-1568-13
TCGA-24-1553-01A-01R-1566-13
TCGA-61-2000-01A-01R-1568-13
TCGA-13-0905-01B-01R-1565-13
TCGA-24-1467-01A-01R-1566-13
TCGA-13-1499-01A-01R-1565-13
TCGA-09-1661-01B-01R-1566-13
TCGA-25-2396-01A-01R-1569-13
TCGA-13-1496-01A-01R-1565-13
TCGA-29-1694-01A-01R-1567-13
TCGA-24-1616-01A-01R-1566-13
TCGA-23-2077-01A-01R-1568-13
TCGA-04-1362-01A-01R-1565-13
TCGA-36-1577-01A-01R-1566-13
TCGA-24-2026-01A-01R-1567-13
TCGA-29-2414-02A-01R-1569-13
TCGA-24-1419-01A-01R-1565-13
TCGA-09-2048-01A-01R-1568-13
TCGA-61-2002-01A-01R-1568-13
TCGA-61-2003-01A-01R-1568-13
TCGA-13-0765-01A-01R-1564-13
TCGA-36-1581-01A-01R-1566-13
TCGA-13-1489-01A-01R-1565-13
TCGA-13-1506-01A-01R-1565-13
TCGA-23-1111-01A-01R-1567-13
TCGA-24-2280-01A-01R-1568-13
TCGA-13-0900-01B-01R-1565-13
TCGA-13-1408-01A-01R-1565-13
TCGA-29-1762-01A-01R-1567-13
TCGA-09-2045-01A-01R-1568-13
TCGA-09-2056-01B-01R-1568-13
TCGA-13-0885-01A-02R-1569-13
TCGA-25-2401-01A-01R-1569-13
TCGA-59-2348-01A-01R-1569-13
TCGA-25-1635-01A-01R-1566-13
TCGA-61-1914-01A-01R-1567-13
TCGA-61-1919-01A-01R-1568-13
TCGA-61-2088-01A-01R-1568-13
TCGA-09-1670-01A-01R-1566-13
TCGA-13-0923-01A-01R-1564-13
TCGA-31-1950-01A-01R-1568-13
TCGA-13-0916-01A-01R-1564-13
TCGA-24-1471-01A-01R-1566-13
TCGA-13-0795-01A-01R-1564-13
TCGA-13-0800-01A-01R-1564-13
TCGA-04-1341-01A-01R-1564-13
TCGA-23-1118-01A-01R-1564-13
TCGA-61-2008-02A-01R-1568-13
TCGA-61-2098-01A-01R-1568-13
TCGA-04-1343-01A-01R-1564-13
TCGA-29-1766-01A-01R-1567-13
TCGA-61-2008-01A-02R-1568-13
TCGA-24-1604-01A-01R-1566-13
TCGA-24-1431-01A-01R-1566-13
TCGA-13-2060-01A-01R-1568-13
TCGA-13-0714-01A-01R-1564-13
TCGA-59-2355-01A-01R-1569-13
TCGA-61-2101-01A-01R-1568-13
TCGA-23-1107-01A-01R-1564-13
TCGA-59-2363-01A-01R-1569-13
TCGA-13-0726-01A-01R-1564-13
TCGA-36-1580-01A-01R-1566-13
TCGA-13-0888-01A-01R-1564-13
TCGA-29-1776-01A-01R-1567-13
TCGA-61-2092-01A-01R-1568-13
TCGA-20-1686-01A-01R-1566-13
TCGA-61-1910-01A-01R-1567-13
TCGA-09-1668-01B-01R-1566-13

## Sheet: TCGA-OV CNV dataset
Case ID
TCGA-13-0730-01A
TCGA-23-1027-01A
TCGA-13-0887-01A
TCGA-61-1907-01A
TCGA-04-1651-01A
TCGA-61-2109-01A
TCGA-24-1550-01A
TCGA-13-0720-01A
TCGA-13-1405-01A
TCGA-13-1403-01A
TCGA-04-1655-01A
TCGA-04-1365-01A
TCGA-24-0982-01A
TCGA-23-1111-01A
TCGA-25-1319-01A
TCGA-30-1860-01A
TCGA-57-1994-01A
TCGA-13-1512-01A
TCGA-13-1510-01A
TCGA-59-2363-01A
TCGA-23-1021-01B
TCGA-29-2425-01A
TCGA-29-1705-01A
TCGA-24-2280-01A
TCGA-23-1123-01A
TCGA-61-1998-01A
TCGA-13-1404-01A
TCGA-09-1668-01B
TCGA-24-2036-01A
TCGA-24-1923-01A
TCGA-24-2024-01A
TCGA-29-1784-01A
TCGA-23-1024-01A
TCGA-23-1122-01A
TCGA-29-1776-01A
TCGA-20-1686-01A
TCGA-VG-A8LO-01A
TCGA-04-1536-01A
TCGA-61-1911-01A
TCGA-13-1506-01A
TCGA-13-0724-01A
TCGA-13-1505-01A
TCGA-30-1866-01A
TCGA-30-1714-01A
TCGA-09-1673-01A
TCGA-61-1725-01A
TCGA-13-0916-01A
TCGA-04-1519-01A
TCGA-61-1736-01B
TCGA-24-1563-01A
TCGA-29-2428-01A
TCGA-13-0905-01B
TCGA-36-1568-01A
TCGA-24-1422-01A
TCGA-29-A5NZ-01A
TCGA-04-1514-01A
TCGA-24-2254-01A
TCGA-24-1850-01A
TCGA-13-1409-01A
TCGA-20-0987-01A
TCGA-24-1562-01A
TCGA-04-1530-01A
TCGA-10-0938-01A
TCGA-09-2053-01C
TCGA-25-2400-01A
TCGA-36-1569-01A
TCGA-09-1670-01A
TCGA-29-1690-01A
TCGA-24-2288-01A
TCGA-25-2396-01A
TCGA-61-2110-01A
TCGA-25-1635-01A
TCGA-29-1762-01A
TCGA-13-1492-01A
TCGA-04-1356-01A
TCGA-36-1576-01A
TCGA-25-1627-01A
TCGA-23-1028-01A
TCGA-24-1924-01A
TCGA-24-1419-01A
TCGA-29-1785-01A
TCGA-61-2101-01A
TCGA-04-1347-01A
TCGA-23-2084-01A
TCGA-57-1584-01A
TCGA-36-1581-01A
TCGA-23-1107-01A
TCGA-13-2060-01A
TCGA-24-1558-01A
TCGA-13-1485-01A
TCGA-29-1710-01A
TCGA-24-1105-01A
TCGA-13-0886-01A
TCGA-10-0936-01A
TCGA-24-1423-01A
TCGA-24-0968-01A
TCGA-24-1565-01A
TCGA-04-1361-01A
TCGA-24-1928-01A
TCGA-13-0923-01A
TCGA-04-1343-01A
TCGA-09-2045-01A
TCGA-61-1733-01A
TCGA-61-1724-01A
TCGA-25-1317-01A
TCGA-24-1467-01A
TCGA-31-1946-01A
TCGA-09-2048-01A
TCGA-13-1483-01A
TCGA-57-1583-01A
TCGA-24-1842-01A
TCGA-24-2261-01A
TCGA-10-0931-01A
TCGA-09-1661-01B
TCGA-04-1350-01A
TCGA-24-2035-01A
TCGA-23-1110-01A
TCGA-13-1495-01A
TCGA-24-2293-01A
TCGA-25-2393-01A
TCGA-04-1362-01A
TCGA-13-0897-01A
TCGA-24-1846-01A
TCGA-13-0725-01A
TCGA-29-2414-02A
TCGA-57-1586-01A
TCGA-25-2401-01A
TCGA-25-1320-01A
TCGA-24-1434-01A
TCGA-25-1316-01A
TCGA-24-1469-01A
TCGA-09-1667-01C
TCGA-24-1430-01A
TCGA-24-2281-01A
TCGA-25-1321-01A
TCGA-13-1496-01A
TCGA-24-1544-01A
TCGA-25-2404-01A
TCGA-04-1364-01A
TCGA-24-1552-01A
TCGA-24-1416-01A
TCGA-24-2298-01A
TCGA-61-2000-01A
TCGA-25-2398-01A
TCGA-25-1322-01A
TCGA-24-0966-01A
TCGA-25-2399-01A
TCGA-04-1331-01A
TCGA-09-2054-01A
TCGA-61-2098-01A
TCGA-13-1488-01A
TCGA-30-1853-01A
TCGA-13-0797-01A
TCGA-30-1861-01A
TCGA-29-1693-01A
TCGA-13-1410-01A
TCGA-09-1665-01B
TCGA-24-1930-01A
TCGA-29-2427-01A
TCGA-13-0714-01A
TCGA-30-1862-01A
TCGA-24-1427-01A
TCGA-61-2113-01A
TCGA-29-1697-01A
TCGA-61-2104-01A
TCGA-25-2409-01A
TCGA-13-1407-01A
TCGA-24-1435-01A
TCGA-24-1603-01A
TCGA-5X-AA5U-01A
TCGA-25-1633-01A
TCGA-13-0893-01B
TCGA-09-2051-01A
TCGA-13-0888-01A
TCGA-61-1914-01A
TCGA-23-1116-01A
TCGA-29-1688-01A
TCGA-13-0911-01A
TCGA-10-0927-01A
TCGA-23-1809-01A
TCGA-13-1511-01A
TCGA-24-1418-01A
TCGA-29-1769-01A
TCGA-29-1766-01A
TCGA-24-1616-01A
TCGA-13-1487-01A
TCGA-57-1582-01A
TCGA-13-0727-01A
TCGA-29-1695-01A
TCGA-24-1104-01A
TCGA-23-1026-01B
TCGA-29-2414-01A
TCGA-29-1703-01A
TCGA-29-1694-01A
TCGA-24-1844-01A
TCGA-13-1499-01A
TCGA-61-2008-02A
TCGA-29-1781-01A
TCGA-09-1666-01A
TCGA-24-1103-01A
TCGA-29-1778-01A
TCGA-24-2020-01A
TCGA-24-1560-01A
TCGA-09-1659-01B
TCGA-30-1718-01A
TCGA-25-1318-01A
TCGA-59-2352-01A
TCGA-61-2092-01A
TCGA-61-2009-01A
TCGA-OY-A56Q-01A
TCGA-24-2023-01A
TCGA-24-2038-01A
TCGA-13-0795-01A
TCGA-61-1919-01A
TCGA-25-1323-01A
TCGA-61-1741-01A
TCGA-13-0762-01A
TCGA-13-0883-01A
TCGA-24-1428-01A
TCGA-13-1408-01A
TCGA-23-1030-01A
TCGA-61-2102-01A
TCGA-23-2077-01A
TCGA-13-1477-01A
TCGA-25-2391-01A
TCGA-24-1845-01A
TCGA-09-0369-01A
TCGA-36-1571-01A
TCGA-04-1542-01A
TCGA-61-2012-01A
TCGA-25-1632-01A
TCGA-23-1114-01B
TCGA-13-0884-01B
TCGA-23-1029-01B
TCGA-24-1431-01A
TCGA-09-0364-01A
TCGA-61-2111-01A
TCGA-23-1023-01A
TCGA-29-1763-01A
TCGA-23-2078-01A
TCGA-29-1691-01A
TCGA-24-1474-01A
TCGA-24-1557-01A
TCGA-36-1570-01A
TCGA-WR-A838-01A
TCGA-23-1109-01A
TCGA-61-1918-01A
TCGA-25-1631-01A
TCGA-13-1489-02A
TCGA-09-2056-01B
TCGA-36-1580-01A
TCGA-24-1546-01A
TCGA-09-0367-01A
TCGA-29-1707-02A
TCGA-13-1507-01A
TCGA-20-1683-01A
TCGA-61-1737-01A
TCGA-10-0933-01A
TCGA-24-1551-01A
TCGA-13-0901-01B
TCGA-13-0924-01A
TCGA-04-1357-01A
TCGA-61-1721-01A
TCGA-31-1950-01A
TCGA-20-1687-01A
TCGA-13-1498-01A
TCGA-23-1120-01A
TCGA-61-2003-01A
TCGA-13-1501-01A
TCGA-24-1417-01A
TCGA-04-1341-01A
TCGA-31-1959-01A
TCGA-09-1662-01A
TCGA-36-1577-01A
TCGA-29-1777-01A
TCGA-29-1774-01A
TCGA-04-1338-01A
TCGA-59-2355-01A
TCGA-23-1113-01A
TCGA-30-1891-01A
TCGA-30-1892-01A
TCGA-20-1682-01A
TCGA-25-1626-01A
TCGA-23-1119-01A
TCGA-59-2351-01A
TCGA-61-1728-01A
TCGA-13-0920-01A
TCGA-24-1843-01A
TCGA-25-1877-01A
TCGA-24-2297-01A
TCGA-24-2026-01A
TCGA-24-1553-01A
TCGA-09-0366-01A
TCGA-57-1993-01A
TCGA-24-1604-01A
TCGA-24-2262-01A
TCGA-25-1313-01A
TCGA-13-0804-01A
TCGA-61-2097-01A
TCGA-36-1574-01A
TCGA-29-1761-01A
TCGA-29-1768-01A
TCGA-24-2289-01A
TCGA-25-1623-01A
TCGA-24-1471-01A
TCGA-29-1711-01A
TCGA-25-2392-01A
TCGA-61-1910-01A
TCGA-13-0891-01A
TCGA-13-1489-01A
TCGA-25-1312-01A
TCGA-13-0766-01A
TCGA-13-0726-01A
TCGA-29-1701-01A
TCGA-13-1509-01A
TCGA-24-2290-01A
TCGA-20-0991-01A
TCGA-24-1470-01A
TCGA-24-1847-01A
TCGA-13-0913-02A
TCGA-13-0885-01A
TCGA-24-1413-01A
TCGA-59-2350-01A
TCGA-24-1425-01A
TCGA-57-1585-01A
TCGA-29-1783-01A
TCGA-24-2271-01A
TCGA-24-1424-01A
TCGA-31-1944-01A
TCGA-59-2348-01A
TCGA-61-2008-01A
TCGA-30-1857-01A
TCGA-13-0765-01A
TCGA-13-0800-01A
TCGA-10-0928-01A
TCGA-13-0908-01B
TCGA-24-1464-01A
TCGA-29-1696-01A
TCGA-09-2044-01B
TCGA-24-0970-01B
TCGA-24-2267-01A
TCGA-13-1497-01A
TCGA-25-2042-01A
TCGA-24-1426-01A
TCGA-59-2354-01A
TCGA-13-0900-01B
TCGA-25-1628-01A
TCGA-31-1951-01A
TCGA-61-1995-01A
TCGA-04-1332-01A
TCGA-24-2027-01A
TCGA-59-A5PD-01A
TCGA-13-0768-01A
TCGA-13-A5FT-01A
TCGA-24-1567-01A
TCGA-24-0979-01A
TCGA-25-1630-01A
TCGA-31-1953-01A
TCGA-31-1956-01A
TCGA-24-2033-01A
TCGA-29-1770-01A
TCGA-04-1648-01A
TCGA-23-1118-01A
TCGA-25-1634-01A
TCGA-13-1411-01A
TCGA-61-2002-01A
TCGA-61-2088-01A
TCGA-61-1738-01A
TCGA-25-1315-01A
TCGA-10-0937-01A
TCGA-23-1022-01A
TCGA-13-0906-01A
TCGA-25-1329-01A
TCGA-24-1549-01A
TCGA-25-1870-01A
TCGA-09-1669-01A

## Sheet: TCGA-OV methylation dataset
bcr_patient_barcode
TCGA-24-1469-01A-01D-0501-05
TCGA-25-2396-01A-01D-0708-05
TCGA-23-1122-01A-01D-0432-05
TCGA-24-1928-01A-01D-0652-05
TCGA-13-0797-01A-01D-0359-05
TCGA-20-0991-01A-03D-0432-05
TCGA-61-1737-01A-01D-0581-05
TCGA-23-2077-01A-01D-0667-05
TCGA-13-0911-01A-01D-0402-05
TCGA-61-2000-01A-01D-0667-05
TCGA-36-1580-01A-01D-0536-05
TCGA-09-0367-01A-01D-0359-05
TCGA-13-1498-01A-01D-0475-05
TCGA-04-1347-01A-01D-0432-05
TCGA-25-2401-01A-01D-0708-05
TCGA-25-1870-01A-01D-0652-05
TCGA-25-1315-01A-01D-0460-05
TCGA-61-2097-01A-02D-0667-05
TCGA-24-2293-01A-01D-0708-05
TCGA-24-1563-01A-01D-0501-05
TCGA-24-1419-01A-01D-0475-05
TCGA-61-2088-01A-01D-0667-05
TCGA-09-1673-01A-01D-0563-05
TCGA-61-1907-01A-01D-0581-05
TCGA-36-1569-01A-01D-0536-05
TCGA-13-0766-01A-02D-0359-05
TCGA-29-1691-01A-01D-0563-05
TCGA-13-0795-01A-01D-0359-05
TCGA-24-1467-01A-01D-0475-05
TCGA-25-1323-01A-01D-0460-05
TCGA-29-2425-01A-01D-0708-05
TCGA-24-1424-01A-01D-0475-05
TCGA-61-2109-01A-01D-0667-05
TCGA-24-1846-01A-01D-0581-05
TCGA-24-1557-01A-01D-0536-05
TCGA-13-1495-01A-01D-0475-05
TCGA-24-1464-01A-01D-0475-05
TCGA-30-1857-01A-02D-0581-05
TCGA-25-2392-01A-01D-0708-05
TCGA-61-1741-01A-02D-0581-05
TCGA-13-0720-01A-01D-0359-05
TCGA-30-1718-01A-01D-0563-05
TCGA-24-1567-01A-01D-0536-05
TCGA-29-1770-01A-01D-0563-05
TCGA-23-1123-01A-01D-0432-05
TCGA-09-0366-01A-01D-0359-05
TCGA-13-1487-01A-01D-0475-05
TCGA-36-1581-01A-01D-0536-05
TCGA-WR-A838-01A-12D-A409-05
TCGA-24-1546-01A-01D-0536-05
TCGA-09-1667-01C-01D-0536-05
TCGA-24-1544-01A-01D-0536-05
TCGA-61-1721-01A-01D-0652-05
TCGA-59-2355-01A-01D-0708-05
TCGA-13-1496-01A-01D-0475-05
TCGA-24-2254-01A-01D-0667-05
TCGA-61-1910-01A-01D-0581-05
TCGA-61-1998-01A-01D-0667-05
TCGA-24-2271-01A-01D-0708-05
TCGA-25-1320-01A-01D-0460-05
TCGA-09-0369-01A-01D-0359-05
TCGA-25-1634-01A-01D-0536-05
TCGA-24-1844-01A-01D-0581-05
TCGA-25-1626-01A-01D-0536-05
TCGA-25-1877-01A-01D-0652-05
TCGA-04-1332-01A-01D-0432-05
TCGA-04-1648-01A-01D-0581-05
TCGA-30-1862-01A-02D-0652-05
TCGA-04-1651-01A-01D-0581-05
TCGA-24-1103-01A-01D-0432-05
TCGA-04-1365-01A-01D-0460-05
TCGA-25-1628-01A-01D-0536-05
TCGA-59-2363-01A-01D-0708-05
TCGA-24-2290-01A-01D-0708-05
TCGA-13-0916-01A-01D-0402-05
TCGA-13-1507-01A-01D-0475-05
TCGA-20-0987-01A-02D-0432-05
TCGA-29-1769-01A-01D-0581-05
TCGA-61-1918-01A-01D-0652-05
TCGA-25-1631-01A-01D-0536-05
TCGA-24-1428-01A-01D-0475-05
TCGA-23-1114-01B-01D-0563-05
TCGA-13-0714-01A-01D-0359-05
TCGA-24-1604-01A-01D-0501-05
TCGA-31-1950-01A-01D-0652-05
TCGA-10-0937-01A-02D-0402-05
TCGA-04-1338-01A-01D-0432-05
TCGA-57-1583-01A-01D-0536-05
TCGA-24-2267-01A-01D-0708-05
TCGA-29-1784-01A-02D-0563-05
TCGA-10-0928-01A-02D-0402-05
TCGA-09-1662-01A-01D-0536-05
TCGA-29-1785-01A-01D-0563-05
TCGA-13-0885-01A-02D-0402-05
TCGA-25-1312-01A-01D-0460-05
TCGA-09-0364-01A-02D-0359-05
TCGA-36-1568-01A-01D-0536-05
TCGA-13-0900-01B-01D-0460-05
TCGA-13-1404-01A-01D-0460-05
TCGA-61-1738-01A-01D-0581-05
TCGA-25-1317-01A-01D-0460-05
TCGA-61-2104-01A-01D-0667-05
TCGA-10-0927-01A-02D-0402-05
TCGA-29-1778-01A-01D-0581-05
TCGA-24-1549-01A-01D-0501-05
TCGA-59-2354-01A-01D-0708-05
TCGA-23-1028-01A-01D-0432-05
TCGA-25-1322-01A-01D-0460-05
TCGA-31-1944-01A-01D-0652-05
TCGA-29-1701-01A-01D-0563-05
TCGA-13-1499-01A-01D-0475-05
TCGA-24-2036-01A-01D-0667-05
TCGA-13-1410-01A-01D-0460-05
TCGA-25-1319-01A-01D-0460-05
TCGA-25-1630-01A-01D-0536-05
TCGA-13-0913-02A-01D-0807-05
TCGA-29-1705-01A-01D-0563-05
TCGA-24-2020-01A-01D-0652-05
TCGA-29-2414-01A-02D-0708-05
TCGA-24-1842-01A-01D-0581-05
TCGA-24-1471-01A-01D-0501-05
TCGA-61-2098-01A-01D-0667-05
TCGA-61-2111-01A-01D-0667-05
TCGA-09-1659-01B-01D-0536-05
TCGA-61-1919-01A-01D-0652-05
TCGA-13-0920-01A-01D-0402-05
TCGA-13-0906-01A-01D-0402-05
TCGA-13-1407-01A-01D-0460-05
TCGA-13-0897-01A-01D-0402-05
TCGA-20-1687-01A-01D-0563-05
TCGA-20-1686-01A-01D-0563-05
TCGA-24-1474-01A-01D-0501-05
TCGA-09-1669-01A-01D-0536-05
TCGA-29-1781-01A-01D-0563-05
TCGA-24-1843-01A-01D-0581-05
TCGA-24-1104-01A-01D-0432-05
TCGA-24-2280-01A-01D-0708-05
TCGA-10-0936-01A-01D-0402-05
TCGA-13-1492-01A-01D-0475-05
TCGA-23-1116-01A-01D-0432-05
TCGA-30-1860-01A-01D-0652-05
TCGA-29-1761-01A-01D-0563-05
TCGA-24-2262-01A-01D-0708-05
TCGA-09-2044-01B-01D-0708-05
TCGA-59-2350-01A-01D-0708-05
TCGA-04-1356-01A-01D-0460-05
TCGA-25-2399-01A-01D-0708-05
TCGA-29-1690-01A-01D-0563-05
TCGA-09-1661-01B-01D-0536-05
TCGA-04-1536-01A-01D-0536-05
TCGA-24-1422-01A-01D-0475-05
TCGA-61-1914-01A-01D-0581-05
TCGA-13-0905-01B-01D-0460-05
TCGA-04-1542-01A-01D-0501-05
TCGA-13-0726-01A-01D-0359-05
TCGA-24-1553-01A-01D-0501-05
TCGA-23-1809-01A-01D-0563-05
TCGA-25-1633-01A-01D-0536-05
TCGA-25-2409-01A-01D-0708-05
TCGA-31-1956-01A-01D-0652-05
TCGA-24-1417-01A-01D-0475-05
TCGA-13-0893-01B-01D-0460-05
TCGA-13-0730-01A-01D-0359-05
TCGA-13-0901-01B-01D-0460-05
TCGA-24-1470-01A-01D-0501-05
TCGA-04-1362-01A-01D-0460-05
TCGA-13-1477-01A-01D-0475-05
TCGA-23-1023-01A-03D-0432-05
TCGA-13-1483-01A-01D-0475-05
TCGA-61-1736-01B-01D-0667-05
TCGA-23-1118-01A-01D-0432-05
TCGA-04-1361-01A-01D-0460-05
TCGA-30-1853-01A-02D-0652-05
TCGA-61-1725-01A-01D-0581-05
TCGA-29-1696-01A-01D-0563-05
TCGA-31-1953-01A-01D-0652-05
TCGA-57-1586-01A-02D-0563-05
TCGA-24-2261-01A-01D-0667-05
TCGA-24-1616-01A-01D-0501-05
TCGA-13-0800-01A-01D-0359-05
TCGA-25-1627-01A-01D-0536-05
TCGA-13-1411-01A-01D-0460-05
TCGA-25-1328-01A-01D-0460-05
TCGA-13-1408-01A-01D-0460-05
TCGA-13-1403-01A-01D-0460-05
TCGA-24-1930-01A-01D-0652-05
TCGA-30-1714-01A-02D-0563-05
TCGA-29-1783-01A-01D-0563-05
TCGA-04-1350-01A-01D-0460-05
TCGA-24-0982-01A-01D-0432-05
TCGA-25-2391-01A-01D-0708-05
TCGA-20-1683-01A-01D-0563-05
TCGA-61-1733-01A-01D-0581-05
TCGA-24-0968-01A-01D-0432-05
TCGA-23-1120-01A-02D-0432-05
TCGA-29-1707-02A-01D-0807-05
TCGA-24-1434-01A-01D-0475-05
TCGA-29-1776-01A-01D-0581-05
TCGA-13-1509-01A-01D-0475-05
TCGA-23-2084-01A-02D-0667-05
TCGA-59-2351-01A-01D-0708-05
TCGA-24-2298-01A-01D-0708-05
TCGA-25-2400-01A-01D-0708-05
TCGA-25-1318-01A-01D-0460-05
TCGA-13-1497-01A-01D-0475-05
TCGA-29-1762-01A-01D-0563-05
TCGA-24-1924-01A-01D-0652-05
TCGA-24-0979-01A-01D-0432-05
TCGA-24-1565-01A-01D-0501-05
TCGA-13-1501-01A-01D-0475-05
TCGA-30-1866-01A-02D-0652-05
TCGA-13-A5FT-01A-11D-A409-05
TCGA-29-1766-01A-01D-0563-05
TCGA-13-0891-01A-01D-0402-05
TCGA-24-2038-01A-01D-0667-05
TCGA-31-1959-01A-01D-0652-05
TCGA-09-2053-01C-01D-0667-05
TCGA-24-1435-01A-01D-0475-05
TCGA-24-1603-01A-01D-0501-05
TCGA-24-1413-01A-01D-0460-05
TCGA-09-1668-01B-01D-0536-05
TCGA-29-1711-01A-01D-0563-05
TCGA-30-1861-01A-01D-0652-05
TCGA-59-2348-01A-01D-0708-05
TCGA-04-1530-01A-02D-0501-05
TCGA-13-0884-01B-01D-0460-05
TCGA-61-2110-01A-01D-0667-05
TCGA-24-1427-01A-01D-0475-05
TCGA-61-1911-01A-01D-0581-05
TCGA-13-0727-01A-01D-0359-05
TCGA-23-1029-01B-01D-0581-05
TCGA-24-1552-01A-01D-0501-05
TCGA-61-2002-01A-01D-0667-05
TCGA-25-1632-01A-01D-0536-05
TCGA-23-1113-01A-01D-0432-05
TCGA-24-2288-01A-01D-0708-05
TCGA-61-2102-01A-01D-0667-05
TCGA-23-1021-01B-01D-0432-05
TCGA-13-0924-01A-01D-0402-05
TCGA-24-0970-01B-01D-0432-05
TCGA-57-1582-01A-01D-0536-05
TCGA-13-1485-01A-02D-0475-05
TCGA-36-1576-01A-01D-0536-05
TCGA-23-1119-01A-02D-0432-05
TCGA-24-2289-01A-01D-0708-05
TCGA-29-1710-01A-02D-0563-05
TCGA-29-A5NZ-01A-11D-A409-05
TCGA-13-1505-01A-01D-0475-05
TCGA-24-1562-01A-01D-0501-05
TCGA-13-0725-01A-01D-0359-05
TCGA-24-1425-01A-02D-0501-05
TCGA-24-2023-01A-01D-0652-05
TCGA-13-1405-01A-01D-0460-05
TCGA-10-0931-01A-01D-0402-05
TCGA-13-1511-01A-01D-0475-05
TCGA-10-0938-01A-02D-0402-05
TCGA-61-2092-01A-01D-0667-05
TCGA-29-1703-01A-01D-0563-05
TCGA-25-1635-01A-01D-0536-05
TCGA-04-1364-01A-01D-0460-05
TCGA-61-1995-01A-01D-0667-05
TCGA-09-2045-01A-01D-0708-05
TCGA-13-0888-01A-01D-0402-05
TCGA-61-1724-01A-01D-0652-05
TCGA-13-0804-01A-01D-0359-05
TCGA-24-1418-01A-01D-0475-05
TCGA-13-0762-01A-01D-0359-05
TCGA-25-1623-01A-01D-0536-05
TCGA-04-1357-01A-01D-0460-05
TCGA-24-1416-01A-01D-0475-05
TCGA-24-1426-01A-01D-0475-05
TCGA-13-1409-01A-01D-0460-05
TCGA-13-1489-01A-01D-0475-05
TCGA-23-1022-01A-02D-0432-05
TCGA-61-2101-01A-01D-0667-05
TCGA-25-2398-01A-01D-0708-05
TCGA-24-1845-01A-01D-0581-05
TCGA-5X-AA5U-01A-11D-A409-05
TCGA-13-2060-01A-01D-0708-05
TCGA-23-1110-01A-01D-0432-05
TCGA-24-1847-01A-01D-0563-05
TCGA-36-1571-01A-01D-0536-05
TCGA-09-2051-01A-01D-0708-05
TCGA-13-0923-01A-01D-0402-05
TCGA-04-1514-01A-01D-0501-05
TCGA-25-1321-01A-01D-0460-05
TCGA-29-1777-01A-01D-0581-05
TCGA-23-1107-01A-01D-0432-05
TCGA-24-1431-01A-01D-0475-05
TCGA-24-1105-01A-01D-0432-05
TCGA-13-0768-01A-01D-0359-05
TCGA-25-1316-01A-01D-0460-05
TCGA-29-2427-01A-01D-0708-05
TCGA-13-1510-01A-02D-0475-05
TCGA-61-1728-01A-01D-0652-05
TCGA-20-1682-01A-01D-0563-05
TCGA-61-2009-01A-01D-0667-05
TCGA-25-2393-01A-01D-0708-05
TCGA-24-1550-01A-01D-0501-05
TCGA-61-2008-02A-01D-0807-05
TCGA-25-1329-01A-01D-0460-05
TCGA-59-2352-01A-01D-0708-05
TCGA-09-2048-01A-01D-0708-05
TCGA-04-1341-01A-01D-0432-05
TCGA-61-2113-01A-01D-0667-05
TCGA-61-2008-01A-02D-0667-05
TCGA-57-1993-01A-01D-0652-05
TCGA-36-1574-01A-01D-0536-05
TCGA-09-1666-01A-01D-0536-05
TCGA-36-1577-01A-01D-0536-05
TCGA-25-1326-01A-01D-0460-05
TCGA-24-2033-01A-01D-0667-05
TCGA-13-1506-01A-01D-0475-05
TCGA-24-2035-01A-01D-0667-05
TCGA-57-1585-01A-01D-0536-05
TCGA-24-1423-01A-01D-0475-05
TCGA-24-1430-01A-01D-0475-05
TCGA-24-2024-01A-02D-0667-05
TCGA-13-0908-01B-01D-0460-05
TCGA-57-1994-01A-01D-0652-05
TCGA-24-2027-01A-01D-0652-05
TCGA-OY-A56Q-01A-11D-A409-05
TCGA-30-1891-01A-01D-0652-05
TCGA-29-1774-01A-01D-0581-05
TCGA-29-1695-01A-01D-0563-05
TCGA-04-1655-01A-01D-0563-05
TCGA-13-0724-01A-01D-0359-05
TCGA-24-1560-01A-01D-0536-05
TCGA-04-1331-01A-01D-0432-05
TCGA-23-1027-01A-02D-0432-05
TCGA-13-0887-01A-01D-0402-05
TCGA-13-0765-01A-01D-0359-05
TCGA-24-2281-01A-01D-0708-05
TCGA-24-1923-01A-01D-0652-05
TCGA-23-1026-01B-01D-0432-05
TCGA-13-1488-01A-01D-0475-05
TCGA-29-1763-01A-02D-0563-05
TCGA-23-1109-01A-01D-0432-05
TCGA-09-2056-01B-01D-0667-05
TCGA-24-2026-01A-01D-0652-05
TCGA-24-2297-01A-01D-0708-05
TCGA-04-1519-01A-01D-0536-05
TCGA-57-1584-01A-01D-0536-05
TCGA-24-1850-01A-01D-0581-05
TCGA-09-1670-01A-01D-0563-05
TCGA-25-2404-01A-01D-0708-05
TCGA-61-2012-01A-01D-0667-05
TCGA-04-1343-01A-01D-0432-05
TCGA-24-1551-01A-01D-0501-05
TCGA-24-0966-01A-01D-0402-05
TCGA-13-1512-01A-01D-0475-05
TCGA-31-1946-01A-01D-0652-05
TCGA-25-1313-01A-01D-0460-05
TCGA-23-1024-01A-02D-0432-05
TCGA-13-0883-01A-02D-0402-05
TCGA-36-1570-01A-01D-0536-05
TCGA-13-0886-01A-01D-0402-05
TCGA-29-1693-01A-01D-0563-05
TCGA-25-2042-01A-01D-0708-05
TCGA-09-2054-01A-01D-0667-05
TCGA-31-1951-01A-01D-0652-05
TCGA-29-1694-01A-01D-0563-05
TCGA-24-1558-01A-01D-0536-05
TCGA-29-1697-01A-01D-0563-05
TCGA-23-1030-01A-02D-0432-05
TCGA-59-A5PD-01A-11D-A409-05
TCGA-13-1489-02A-01D-0807-05
TCGA-23-2078-01A-01D-0667-05
TCGA-30-1892-01A-01D-0652-05
TCGA-VG-A8LO-01A-11D-A409-05
TCGA-23-1111-01A-01D-0581-05
TCGA-29-2414-02A-01D-0807-05
TCGA-61-2003-01A-01D-0667-05
TCGA-09-1665-01B-01D-0536-05
TCGA-29-1688-01A-01D-0563-05
TCGA-10-0933-01A-01D-0402-05
TCGA-29-1768-01A-01D-0563-05
TCGA-29-2428-01A-01D-0708-05
